# Supplementary material for: Differentiation of human cartilage degeneration by functional MRI mapping—an ex vivo study
Source: Springer Nature journal article supplement (doi:10.1007/s00330-019-06283-9), 2019-06-11
Supplement: MOESM1 [file 16796388]

**Online Supplement 1**

Full description of biomechanical and histologic methods:

**Biomechanical analysis**

Cylindrical cartilage-only samples were prepared from the sample centre region using an 8 mm diameter skin biopsy punch device and scalpels (pfm-medical) within 12 hours of the MR measurements. Once the subchondral bone had been removed and the thickness of the cartilage-only samples determined using a standard digital micrometre (Mitutoyo 293–521; Mitutoyo), samples underwent unconfined compression to a maximum load of 200 N and at a displacement rate of 0.066 mm/s on a universal mechanical testing machine equipped with a 20 mm diameter compressive piston (Zwick/Roell Z2.5; Zwick/Roell). Instantaneous Young’s modulus was derived by fitting a tangent to the stress-strain response between at the strain range of 10-20% (1). Samples were kept hydrated in DMEM and additives throughout the biomechanical measurements.

**Histological analysis**

To avoid potential tissue disruptions and artefact introduction secondary to indentation loading, osteochondral regions directly adjacent to the centre region (used for biomechanical analyses) were harvested for histological analyses. Particular care was taken to harvest tissue regions parallel to the mid-sagittal plane and with similar macroscopic appearance. Upon harvest, the osteochondral tissue was simultaneously decalcified and fixated (Ossa fixona, Diagonal) followed by embedding in paraffin, cutting to 5-µm sections and staining with hematoxylin/eosin and Safranin O according to standard protocols. Sections were assessed using a standard light microscope (Leica DM/LM-P) by three blinded investigators experienced in musculoskeletal histopathology (SN [9 years of experience]; BS [5 years of experience]; DT [4 years of experience]). Sections were assessed on the basis of the Mankin classification (2) with structural, cellular, proteoglycan staining-associated and tidemark integrity-associated properties scored separately and added to give the Mankin sum score (MSS, range, 0 – 14). MSSs of 0 or 14 indicate no or most severe signs of degeneration, respectively. On the basis of their individual MSS cartilage samples were dichotomized and allocated to the intact (*int*, MSS, 0 – 4) or early degenerative subgroup (*ed*, MSS 5 – 8) (2, 3). Following individual assessment of the sections, any differences in the initial scores were discussed until consensus was ultimately reached in all samples. Sample thickness was determined using Diskus software (Leica) and the in-built scaling and caliper function. Thickness measurements were performed perpendicularly from the cartilage surface to the cartilage-bone transition, i.e. “tidemark” line, at three different locations, i.e. at the centre point and at ± 2.0 mm to either side from this position, respectively. Subsequently, mean thickness was calculated.

**Bibliography**

1. Jurvelin JS, Buschmann MD, Hunziker EB. Optical and mechanical determination of Poisson's ratio of adult bovine humeral articular cartilage. J Biomech. 1997;30(3):235-41.

2. Mankin HJ, Dorfman H, Lippiello L, Zarins A. Biochemical and metabolic abnormalities in articular cartilage from osteo-arthritic human hips. II. Correlation of morphology with biochemical and metabolic data. J Bone Joint Surg Am. 1971;53(3):523-37.

3. Gahunia HK, Lemaire C, Babyn PS, Cross AR, Kessler MJ, Pritzker KP. Osteoarthritis in rhesus macaque knee joint: quantitative magnetic resonance imaging tissue characterization of articular cartilage. J Rheumatol. 1995;22(9):1747-56.

**Online Supplement 2**

Spearman’s correlation coefficients for relative changes in quantitative MRI parameters vs. biomechanical parameters

|  |  |  | **Instantaneous Young’s modulus** |
| --- | --- | --- | --- |
| T1 | intact | **∆½** | 0.0455 (p=0.805) |
| **∆1** | 0.1448 (p=0.429) |
| early deg | **∆½** | -0.1087 (p=0.613) |
| **∆1** | -0.2104 (p=0.324) |
| T1ρ | intact | **∆½** | 0.18 (p=0.324) |
| **∆1** | 0.2049 (p=0.261) |
| early deg | **∆½** | -0.0757 (p=0.725) |
| **∆1** | -0.2252 (p=0.29) |
| T2 | intact | **∆½** | 0.1257 (p=0.493) |
| **∆1** | 0.2724 (p=0.132) |
| early deg | **∆½** | -0.0574 (p=0.79) |
| **∆1** | -0.213 (p=0.318) |
| T2* | intact | **∆½** | 0.2412 (p=0.184) |
| **∆1** | 0.3332 (p=0.062) |
| early deg | **∆½** | 0.3765 (p=0.07) |
| **∆1** | 0.1991 (p=0.351) |

Spearman’s correlation coefficients between relative changes in qMR parameters (Δ½ [405 µm displacement], Δ1 [810 µm displacement]) and biomechanical properties (i.e. Instantaneous Young’s modulus). Response to loading as referenced to the unloaded state. Intact cartilage, i.e. Mankin sum scores 0-4, vs. early degenerative (early deg) cartilage, i.e. Mankin sum scores 5-8. P-value is given in parenthesis.
